# Supplementary material
Source: Springer Nature journal article supplement (https://www.springermedizin.de/resource/supplementary/13014_2010_329_MOESM1_ESM.pdf/9633396)

Isodoses (Gy)

- 74.500
- 72.500
- 69.630
- 66.100
- 57.000
- 51.300
- 45.000
- 40.000
- 35.000
- 30.000
- 25.000
- 20.000
- 10.000
- 0.000

R

Standard

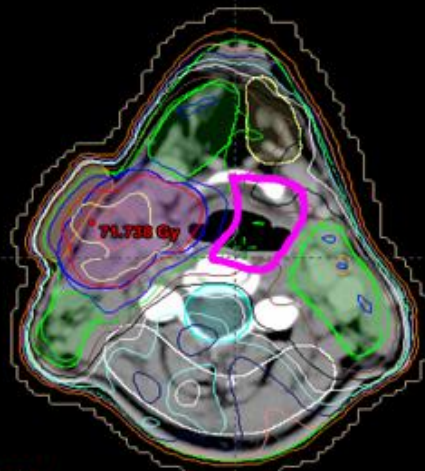

Standard

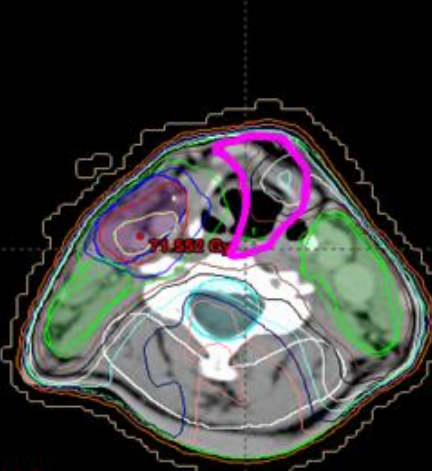

Standard

Head First-Supine  
Z: -7.60 cm

R

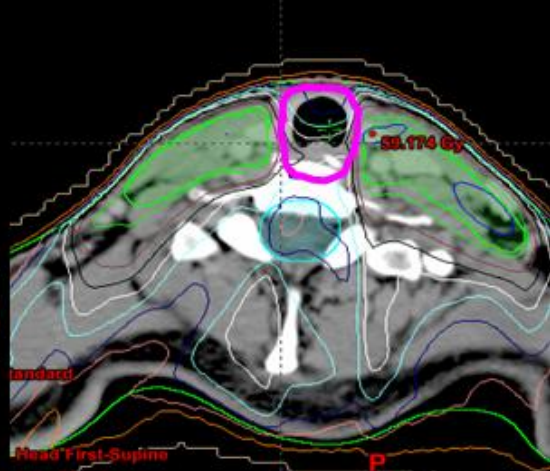

Supplement: MOESM1 [file 9633396]
